# Supplementary material for: Synergistic combination of different types of functional motif in Rb(NO3)(SO3NH3) for realizing excellent ultraviolet optical nonlinearity
Source: Royal Society of Chemistry journal article supplement (doi:10.1039/d4qi01044b), 2024-01-01
Supplement: d4qi01044b1.pdf [file d4qi01044b1.pdf]

**Supporting information for**

**Synergistic Combination of Different Types Functional Motifs in**

**Rb(NO<sub>3</sub>)(SO<sub>3</sub>NH<sub>3</sub>) for Realizing Excellent Ultraviolet Optical**

**Nonlinearity**

Yunxia Song<sup>a</sup>, Chensheng Lin<sup>b</sup>, Xin Zhao<sup>b</sup>, Tao Yan<sup>b</sup>, Ning Ye<sup>c</sup>, Haotian Tian<sup>b\*</sup>, Min Luo<sup>b\*</sup>

<sup>a</sup> School of Electronic, Electrical Engineering and Physics, Fujian University of Technology, Fuzhou, Fujian, 350108, China.

<sup>b</sup> Key Laboratory of Optoelectronic Materials Chemistry and Physics, Fujian Institute of Research on the Structure of Matter, Chinese Academy of Sciences, Fuzhou, Fujian 350002, P. R. China

<sup>c</sup> Tianjin Key Laboratory of Functional Crystal Materials, Institute of Functional Crystal, Tianjin University of Technology, Tianjin 300384, China

Email: [lm8901@fjirsm.ac.cn](mailto:lm8901@fjirsm.ac.cn)

## Table of Contents

| Sections   | Titles                                                                                                                                                                        | pages |
|------------|-------------------------------------------------------------------------------------------------------------------------------------------------------------------------------|-------|
| Table S1.  | Crystal Data and Structure Refinement of Rb(NO <sub>3</sub> )(SO <sub>3</sub> NH <sub>3</sub> ).                                                                              | S3    |
| Table S2.  | Atomic coordinates ( $\times 10^4$ ), equivalent isotropic displacement parameters ( $\text{\AA}^2 \times 10^3$ ) for Rb(NO <sub>3</sub> )(SO <sub>3</sub> NH <sub>3</sub> ). | S3    |
| Table S3.  | Anisotropic Displacement Parameters ( $\text{\AA}^2 \times 10^3$ ) for Rb(NO <sub>3</sub> )(SO <sub>3</sub> NH <sub>3</sub> ).                                                | S3-4  |
| Table S4.  | Bond lengths ( $\text{\AA}$ ) and bond angles ( $^\circ$ ) for Rb(NO <sub>3</sub> )(SO <sub>3</sub> NH <sub>3</sub> ).                                                        | S4-5  |
| Figure S1. | Calculated and experimental powder X-ray diffraction patterns of Rb(NO <sub>3</sub> )(SO <sub>3</sub> NH <sub>3</sub> ).                                                      | S5    |
| Figure S2. | Energy dispersive X-ray spectroscopy analysis of Rb(NO <sub>3</sub> )(SO <sub>3</sub> NH <sub>3</sub> ).                                                                      | S6    |
| Figure S3. | TG-DTA curves of Rb(NO <sub>3</sub> )(SO <sub>3</sub> NH <sub>3</sub> )                                                                                                       | S6    |
| Figure S4. | Partial density of states (PDOS) curves for RbNO <sub>3</sub> and Rb(NO <sub>3</sub> )(SO <sub>3</sub> NH <sub>3</sub> )                                                      | S7    |
| Figure S5. | The SHG density of KNO <sub>3</sub> SO <sub>3</sub> NH <sub>3</sub> and Rb(NO <sub>3</sub> )(SO <sub>3</sub> NH <sub>3</sub> )                                                | S7    |

**Table S1.** Crystal Data and Structure Refinement of Rb(NO<sub>3</sub>)(SO<sub>3</sub>NH<sub>3</sub>).

| Formula                    | H <sub>3</sub> N <sub>2</sub> O <sub>6</sub> RbS  |
|----------------------------|---------------------------------------------------|
| Formula weight(g/mol)      | 244.57                                            |
| Crystal system             | Orthorhombic                                      |
| Space group                | <i>Pmc</i> 2(1)                                   |
| a/Å                        | 5.6303(3)                                         |
| b/Å                        | 7.4552(5)                                         |
| c/Å                        | 8.0537(5)                                         |
| α/°                        | 90                                                |
| β/°                        | 90                                                |
| γ/°                        | 90                                                |
| Volume/Å <sup>3</sup>      | 338.05(4)                                         |
| Z                          | 2                                                 |
| ρ(calcd) g/cm <sup>3</sup> | 2.403                                             |
| μ/mm <sup>-1</sup>         | 7.613                                             |
| F (000)                    | 236                                               |
| Index ranges               | -7 ≤ h ≤ 7,<br>-9 ≤ k ≤ 9,<br>-10 ≤ l ≤ 10        |
| Reflections collected      | 3669                                              |
| R <sub>int</sub>           | 0.0230                                            |
| GOF on F <sup>2</sup>      | 1.139                                             |
| R/wR (I>2 σ(I))            | R <sub>1</sub> = 0.0200, wR <sub>2</sub> = 0.0428 |
| R/wR (all data)            | R <sub>1</sub> = 0.0219, wR <sub>2</sub> = 0.0454 |
| Flack parameter            | 0.017(15)                                         |

$$^aR(F) = \frac{\sum ||F_o| - |F_c||}{\sum |F_o|} \cdot wR(F_o^2) = \frac{[\sum w(F_o^2 - F_c^2)^2 / \sum w(F_o^2)^2]}{1}$$

**Table S2.** Atomic coordinates (×10<sup>4</sup>), equivalent isotropic displacement parameters (Å<sup>2</sup>×10<sup>3</sup>) for Rb(NO<sub>3</sub>)(SO<sub>3</sub>NH<sub>3</sub>).

| Atom | x       | y       | z       | U(eq) | BVS   |
|------|---------|---------|---------|-------|-------|
| Rb   | 0       | 3786(1) | 5977(1) | 35(1) | 1.00  |
| S    | 5000    | 7137(2) | 3770(2) | 29(1) | 6.19  |
| O(1) | 2846(7) | 6308(5) | 4243(6) | 68(1) | -1.77 |
| O(2) | 5000    | 7775(7) | 2109(6) | 50(1) | -1.73 |
| O(3) | 8087(5) | 8202(5) | 7915(5) | 54(1) | -1.66 |
| O(4) | 10000   | 9791(7) | 6146(8) | 56(1) | -1.73 |
| N(1) | 5000    | 9126(7) | 4965(7) | 33(1) | -2.93 |
| N(2) | 10000   | 8739(6) | 7322(7) | 36(1) | 5.04  |

**Table S3.** Anisotropic Displacement Parameters (Å<sup>2</sup>×10<sup>3</sup>) for Rb(NO<sub>3</sub>)(SO<sub>3</sub>NH<sub>3</sub>). The Anisotropic displacement factor exponent takes the form: -2π<sup>2</sup> [h<sup>2</sup>a\*<sup>2</sup>U<sub>11</sub>+2hka\*b\*U<sub>12</sub>+...].

| Atom | U <sub>11</sub> | U <sub>22</sub> | U <sub>33</sub> | U <sub>23</sub> | U <sub>13</sub> | U <sub>12</sub> |
|------|-----------------|-----------------|-----------------|-----------------|-----------------|-----------------|
| Rb   | 39(1)           | 35(1)           | 31(1)           | 6(1)            | 0               | 0               |
| S    | 29(1)           | 26(1)           | 32(1)           | 0(1)            | 0               | 0               |
| O(1) | 68(2)           | 61(3)           | 75(3)           | -16(2)          | 29(2)           | -38(2)          |
| O(2) | 78(3)           | 43(3)           | 29(3)           | 0(2)            | 0               | 0               |

|      |       |       |       |       |       |        |
|------|-------|-------|-------|-------|-------|--------|
| O(3) | 41(2) | 71(3) | 51(2) | 12(2) | -4(2) | -12(2) |
| O(4) | 76(2) | 42(3) | 51(3) | 20(3) | 0     | 0      |
| N(1) | 36(2) | 29(3) | 32(3) | -3(2) | 0     | 0      |
| N(2) | 44(3) | 31(3) | 32(3) | -3(2) | 0     | 0      |

**Table S4.** Bond lengths (Å) and bond angles (°) for Rb(NO<sub>3</sub>)(SO<sub>3</sub>NH<sub>3</sub>).

|                  |            |               |            |
|------------------|------------|---------------|------------|
| Rb-O(1)#1        | 2.837(3)   | Rb-N(2)#4     | 3.495(6)   |
| Rb-O(1)          | 2.837(3)   | Rb-S#7        | 3.6687(10) |
| Rb-O(4)#2        | 2.982(5)   | Rb-S#6        | 3.6687(10) |
| Rb-O(3)#3        | 3.072(4)   | S-O(1)        | 1.414(3)   |
| Rb-O(3)#4        | 3.072(4)   | S-O(1)#8      | 1.414(3)   |
| Rb-O(1)#5        | 3.081(5)   | S-O(2)        | 1.420(5)   |
| Rb-O(1)#6        | 3.081(5)   | S-N(1)        | 1.768(5)   |
| Rb-O(2)#6        | 3.180(2)   | O(3)-N(2)     | 1.244(4)   |
| Rb-O(2)#7        | 3.180(2)   | O(4)-N(2)     | 1.230(8)   |
| O(1)#1-Rb-O(1)   | 68.77(19)  | O(3)#3-Rb-S#7 | 132.12(7)  |
| O(1)#1-Rb-O(4)#2 | 133.17(12) | O(3)#4-Rb-S#7 | 97.63(7)   |
| O(1)-Rb-O(4)#2   | 133.17(12) | O(1)#5-Rb-S#7 | 22.04(7)   |
| O(1)#1-Rb-O(3)#3 | 74.13(11)  | O(1)#6-Rb-S#7 | 82.60(8)   |
| O(1)-Rb-O(3)#3   | 97.03(11)  | O(2)#6-Rb-S#7 | 115.78(8)  |
| O(4)#2-Rb-O(3)#3 | 63.55(14)  | O(2)#7-Rb-S#7 | 22.51(8)   |
| O(1)#1-Rb-O(3)#4 | 97.04(11)  | N(2)#4-Rb-S#7 | 114.55(5)  |
| O(1)-Rb-O(3)#4   | 74.13(11)  | O(1)#1-Rb-S#6 | 89.58(10)  |
| O(4)#2-Rb-O(3)#4 | 63.55(14)  | O(1)-Rb-S#6   | 149.25(9)  |
| O(3)#3-Rb-O(3)#4 | 41.04(12)  | O(4)#2-Rb-S#6 | 77.57(8)   |
| O(1)#1-Rb-O(1)#5 | 136.80(9)  | O(3)#3-Rb-S#6 | 97.63(7)   |
| O(1)-Rb-O(1)#5   | 98.14(13)  | O(3)#4-Rb-S#6 | 132.12(7)  |
| O(4)#2-Rb-O(1)#5 | 86.47(14)  | O(1)#5-Rb-S#6 | 82.60(8)   |
| O(3)#3-Rb-O(1)#5 | 148.95(10) | O(1)#6-Rb-S#6 | 22.04(7)   |
| O(3)#4-Rb-O(1)#5 | 119.48(9)  | O(2)#6-Rb-S#6 | 22.51(8)   |
| O(1)#1-Rb-O(1)#6 | 98.14(13)  | O(2)#7-Rb-S#6 | 115.78(8)  |
| O(1)-Rb-O(1)#6   | 136.81(9)  | N(2)#4-Rb-S#6 | 114.55(5)  |
| O(4)#2-Rb-O(1)#6 | 86.47(14)  | S#7-Rb-S#6    | 100.23(4)  |
| O(3)#3-Rb-O(1)#6 | 119.48(9)  | O(1)-S-O(1)#8 | 118.2(4)   |
| O(3)#4-Rb-O(1)#6 | 148.95(10) | O(1)-S-O(2)   | 113.6(2)   |
| O(1)#5-Rb-O(1)#6 | 62.68(15)  | O(1)#8-S-O(2) | 113.6(2)   |
| O(1)#1-Rb-O(2)#6 | 83.32(12)  | O(1)-S-N(1)   | 102.7(2)   |
| O(1)-Rb-O(2)#6   | 152.08(13) | O(1)#8-S-N(1) | 102.7(2)   |
| O(4)#2-Rb-O(2)#6 | 67.74(10)  | O(2)-S-N(1)   | 103.4(3)   |
| O(3)#3-Rb-O(2)#6 | 75.11(11)  | O(1)-S-Rb#9   | 54.9(2)    |
| O(3)#4-Rb-O(2)#6 | 111.33(11) | O(1)#8-S-Rb#9 | 137.87(19) |
| O(1)#5-Rb-O(2)#6 | 101.97(11) | O(2)-S-Rb#9   | 59.02(10)  |
| O(1)#6-Rb-O(2)#6 | 44.48(10)  | N(1)-S-Rb#9   | 119.41(9)  |
| O(1)#1-Rb-O(2)#7 | 152.08(13) | O(1)-S-Rb#4   | 137.86(19) |
| O(1)-Rb-O(2)#7   | 83.32(12)  | O(1)#8-S-Rb#4 | 54.9(2)    |
| O(4)#2-Rb-O(2)#7 | 67.74(10)  | O(2)-S-Rb#4   | 59.02(10)  |
| O(3)#3-Rb-O(2)#7 | 111.33(11) | N(1)-S-Rb#4   | 119.41(9)  |
| O(3)#4-Rb-O(2)#7 | 75.11(11)  | Rb#9-S-Rb#4   | 100.23(4)  |
| O(1)#5-Rb-O(2)#7 | 44.48(10)  | S-O(1)-Rb     | 155.1(3)   |

|                  |            |                   |            |
|------------------|------------|-------------------|------------|
| O(1)#6-Rb-O(2)#7 | 101.97(11) | S-O(1)-Rb#9       | 103.1(2)   |
| O(2)#6-Rb-O(2)#7 | 124.58(16) | Rb-O(1)-Rb#9      | 96.40(10)  |
| O(1)#1-Rb-N(2)#4 | 86.69(12)  | S-O(2)-Rb#9       | 98.47(14)  |
| O(1)-Rb-N(2)#4   | 86.69(12)  | S-O(2)-Rb#4       | 98.47(14)  |
| O(4)#2-Rb-N(2)#4 | 60.01(16)  | Rb#9-O(2)-Rb#4    | 124.58(16) |
| O(3)#3-Rb-N(2)#4 | 20.58(6)   | N(2)-O(3)-Rb#7    | 99.2(3)    |
| O(3)#4-Rb-N(2)#4 | 20.58(6)   | N(2)-O(4)-Rb#10   | 132.2(5)   |
| O(1)#5-Rb-N(2)#4 | 134.99(9)  | O(4)-N(2)-O(3)    | 120.1(3)   |
| O(1)#6-Rb-N(2)#4 | 134.99(9)  | O(4)-N(2)-O(3)#11 | 120.1(3)   |
| O(2)#6-Rb-N(2)#4 | 92.53(10)  | O(3)-N(2)-O(3)#11 | 119.9(5)   |
| O(2)#7-Rb-N(2)#4 | 92.53(10)  | O(4)-N(2)-Rb#7    | 173.0(4)   |
| O(1)#1-Rb-S#7    | 149.25(9)  | O(3)-N(2)-Rb#7    | 60.2(3)    |
| O(1)-Rb-S#7      | 89.58(10)  | O(3)#11-N(2)-Rb#7 | 60.2(3)    |
| O(4)#2-Rb-S#7    | 77.57(8)   |                   |            |

#1 -x,y,z #2 x-1,y-1,z #3 x-1,-y+1,z-1/2 #4 -x+1,-y+1,z-1/2 #5 x,-y+1,z+1/2 #6 -x,-y+1,z+1/2

#7 -x+1,-y+1,z+1/2 #8 -x+1,y,z #9 -x,-y+1,z-1/2 #10 x+1,y+1,z #11 -x+2,y,z

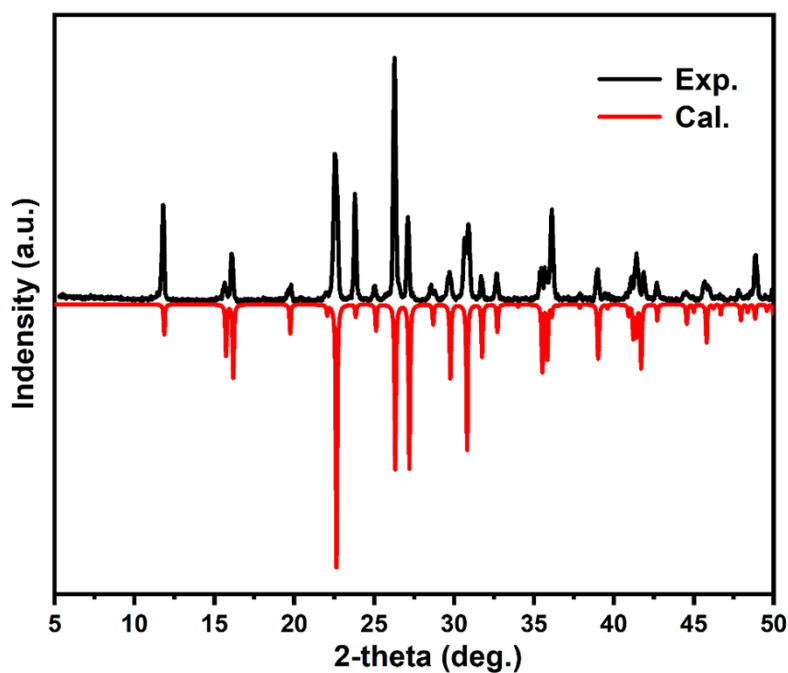

**Figure S1.** Calculated and experimental powder X-ray diffraction patterns of  $\text{Rb}(\text{NO}_3)(\text{SO}_3\text{NH}_3)$ .

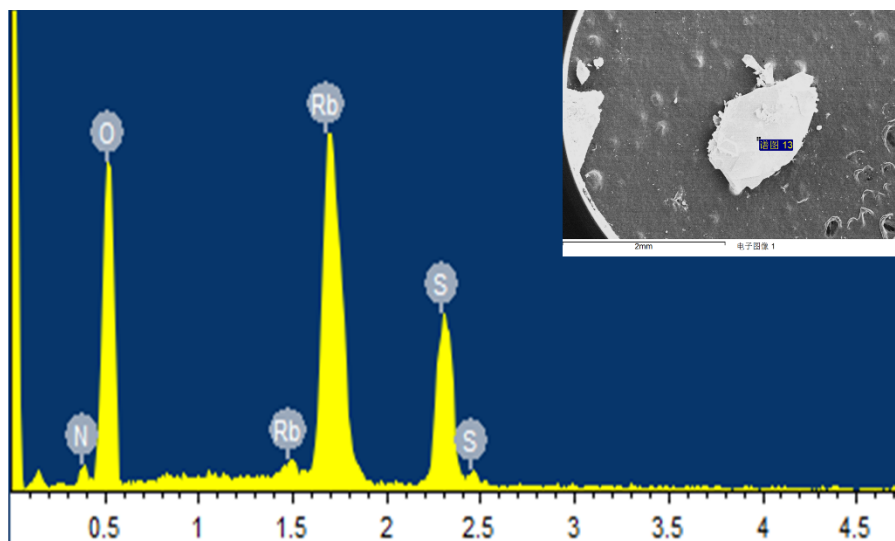

**Figure S2.** Energy dispersive X-ray spectroscopy analysis of  $\text{Rb}(\text{NO}_3)(\text{SO}_3\text{NH}_3)$ .

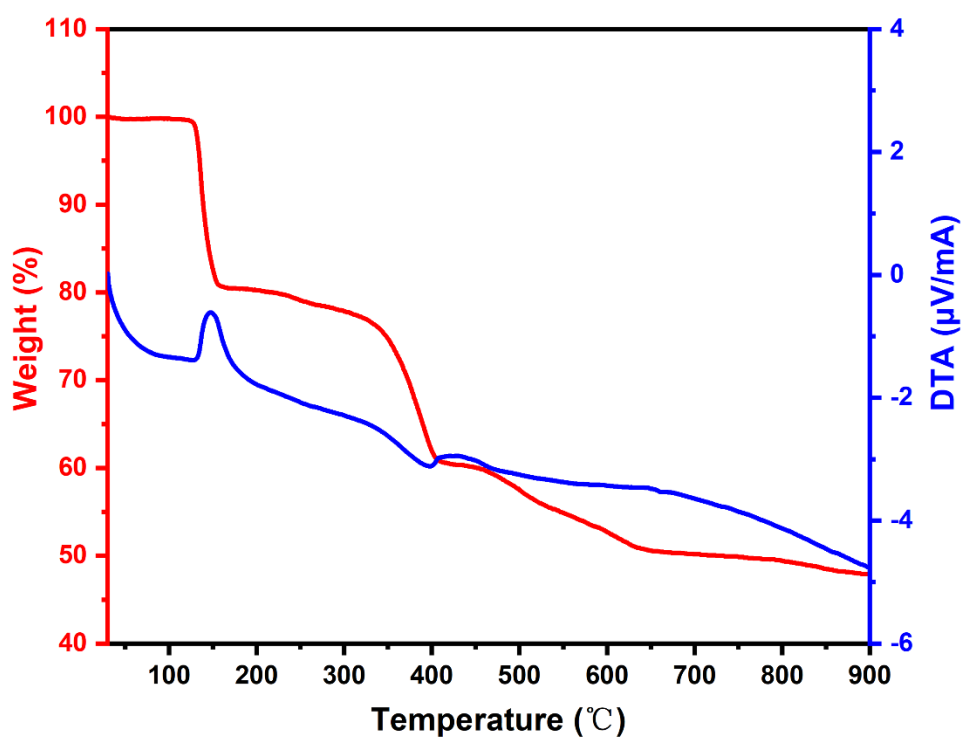

**Figure S3.** TG-DTA curves of  $\text{Rb}(\text{NO}_3)(\text{SO}_3\text{NH}_3)$ .

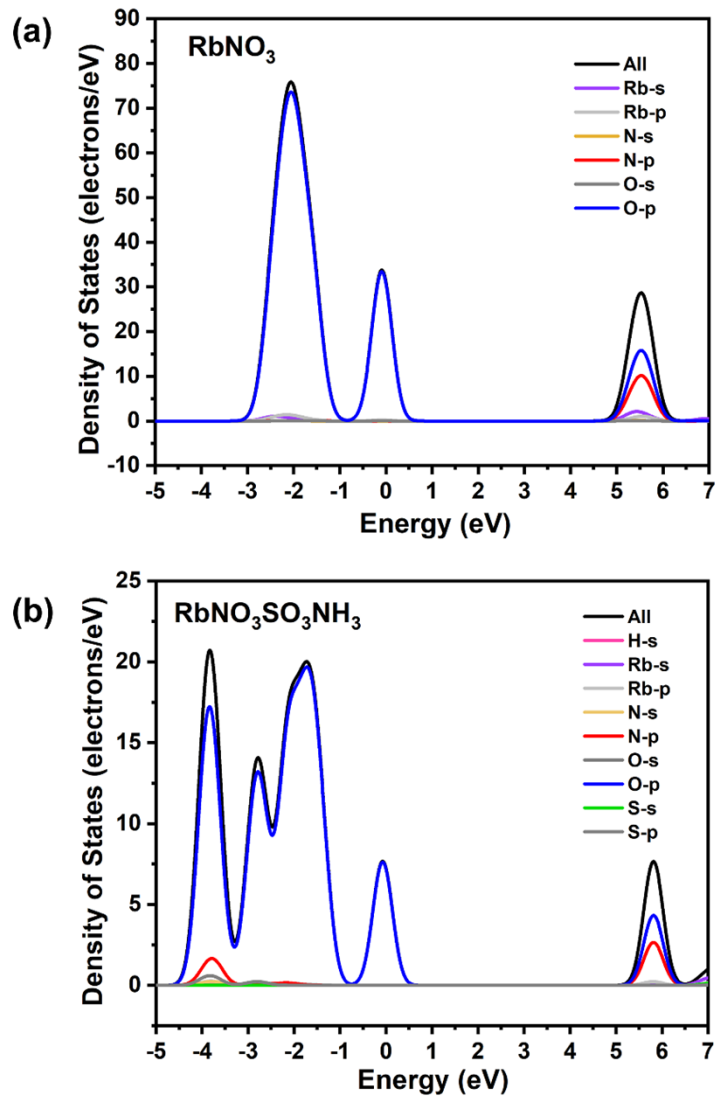

**Figure S4.** Partial density of states (PDOS) curves for  $\text{RbNO}_3$  and  $\text{Rb}(\text{NO}_3)(\text{SO}_3\text{NH}_3)$ .

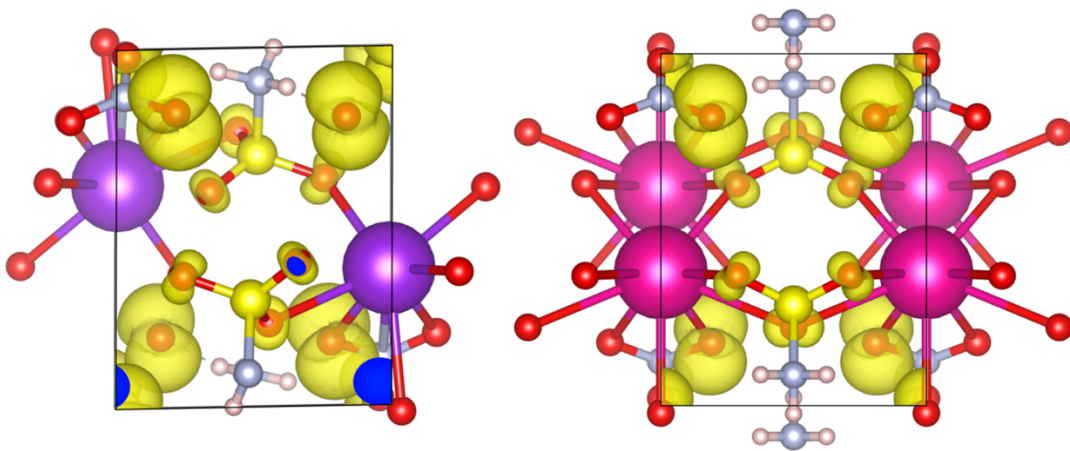

**Figure S5.** The SHG density of  $\text{KNO}_3\text{SO}_3\text{NH}_3$  and  $\text{Rb}(\text{NO}_3)(\text{SO}_3\text{NH}_3)$ .
